# Supplementary material for: Environmental and Genetic Determinants of Serum 25(OH)-Vitamin D Levels during Pregnancy and Early Childhood
Source: MDPI journal article supplement (doi:10.3390/children6100116), 2019-10-21
Supplement: s1 [file s1]

## Methods

### *Blood Sample Analysis*

After collection, the blood samples were centrifuged for 10 min at 4300 rpm to separate serum, subsequently frozen at  $-80^{\circ}\text{C}$  until analysis. The serum samples were transported on dry ice for duplicate analyses for 25(OH)-vitamin D2 and 25(OH)-vitamin D3 at the Dept. of Clinical Biochemistry, Aarhus University Hospital, Denmark. Serum 25-hydroxyvitamin D levels were analyzed by isotope dilution liquid chromatography-tandem mass spectrometry (LC-MS/MS) [1,2]. Calibrators traceable to NIST SRM 972 (Chromsystems, DE) were used. Mean coefficients of variation (CV) for 25(OH)-vitamin D3 were 6.4% and 9.1% at levels of 66.5 and 21.1 nmol/L and for 25(OH)D2 the CV values were 8.8% and 9.4% at levels of 41.2 and 25.3 nmol/L. The average of the combined 25(OH)-vitamin D values was calculated and used in the analysis. If both 25(OH)-vitamin D2 and 25(OH)-vitamin D3 were under the detection level, the combined value was defined as equal to 10 nmol/L.

**Table S1.** Baseline characteristics of pregnant women in COPSAC<sub>2010</sub>.

| Variables                                     | Week 24 Gestation <i>n</i> = 738 | 1 Week Postpartum <i>n</i> = 284 |
|-----------------------------------------------|----------------------------------|----------------------------------|
| Caucasian, N (%)                              | 665 (95.7)                       | 271 (95.4)                       |
| Maternal BMI in kg/m <sup>2</sup> , mean (SD) | 24.5 (4.34)                      | 24.6 (4.34)                      |
| Gestational age in weeks, mean (SD)           | 39.5 (1.69)                      | 39.4 (1.59)                      |
| Caesarian section, N (%)                      | 150 (21.6)                       | 59 (20.8)                        |
| Mother's age at birth in years, mean (SD)     | 32.2 (4.50)                      | 32.0 (4.28)                      |
| SNP rs4588, mean (SD)                         | 1.44 (0.62)                      | 1.44 (0.60)                      |
| SNP rs7041, mean (SD)                         | 1.13 (0.70)                      | 1.16 (0.71)                      |
| Season of blood sample, N (%)                 |                                  |                                  |
| Spring                                        | 146 (19.8)                       | 63 (22.2)                        |
| Summer                                        | 164 (22.2)                       | 57 (20.1)                        |
| Autumn                                        | 233 (31.6)                       | 70 (24.6)                        |
| Winter                                        | 195 (26.4)                       | 94 (33.1)                        |
| Maternal asthma, N (%)                        | 184 (26.6)                       | 76 (26.9)                        |
| Maternal smoking in third trimester, N (%)    | 25 (3.6)                         | 14 (4.9)                         |
| Social circumstances PCA score, mean (SD)     | 0.00 (1.00)                      | -0.07 (0.94)                     |
| Dietary vitamin D intake in µg/d, mean (SD)   | 4.81 (2.81)                      | 4.71 (2.61)                      |

**Table S2.** Baseline characteristics of the children in COPSAC<sub>2000</sub>.

| Variables                                  | Cord Blood <i>n</i> = 257 | 4 Years <i>n</i> = 298 |
|--------------------------------------------|---------------------------|------------------------|
| Male, N (%)                                | 124 (48.2)                | 146 (49.0)             |
| Caucasian, N (%)                           | 249 (96.9)                | 288 (96.6)             |
| BMI in kg/m <sup>2</sup> , mean (SD)       | 12.85 (1.30)              | 15.68 (1.15)           |
| Gestational age in weeks, mean (SD)        | 40.02 (1.53)              | 39.91 (1.62)           |
| Caesarian section, N (%)                   | 50 (19.5)                 | -                      |
| Maternal age at birth in years, mean (SD)  | 29.84 (4.26)              | 30.34 (4.32)           |
| Genetic score                              | 4.78 (1.75)               | 4.76 (1.70)            |
| Season of blood sampling, N (%)            |                           |                        |
| Spring                                     | 56 (21.2)                 | 60 (20.1)              |
| Summer                                     | 74 (28.8)                 | 79 (26.5)              |
| Autumn                                     | 67 (26.1)                 | 93 (31.2)              |
| Winter                                     | 60 (23.3)                 | 66 (22.1)              |
| Older siblings at birth, N (%)             | 106 (41.4)                | 119 (40.3)             |
| Maternal smoking in third trimester, N (%) | 41 (15.95)                | -                      |
| Nicotine hair level in ng/mg, mean (SD)    | -                         | 188.14 (108.48)        |
| Asthma status in third trimester           |                           |                        |
| Better                                     | 79 (30.9)                 | 83 (27.9)              |
| Unchanged                                  | 123 (48.0)                | 155 (52.0)             |
| Worse                                      | 54 (21.1)                 | 60 (20.1)              |
| Social circumstances PCA score, mean (SD)  | 0.00 (0.97)               | 0.04 (0.95)            |

## References

1. Højskov, C.S.; Heickendorff, L.; Møller, H.J. High-throughput liquid-liquid extraction and LCMSMS assay for determination of circulating 25 (OH) vitamin D3 and D2 in the routine clinical laboratory. *Clin. Chim. Acta* **2010**, *411*, 114–116.
2. Maunsell, Z.; Wright, D.J.; Rainbow, S.J. Routine Isotope-Dilution Liquid Chromatography-Tandem Mass Spectrometry Assay for Simultaneous Measurement of the 25-Hydroxy Metabolites of Vitamins D2 and D3. *Clin. Chem.* **2005**, *51*, 1683–1690.
